# Supplementary material for: Drivers for spatial, temporal and long-term trends in atmospheric ammonia and ammonium in the UK
Source: Copernicus journal article supplement (doi:10.5194/acp-2017-259), 2017-04-13
Supplement: Supplementary file 1 [file acp-2017-259-supplement.pdf]

# Supplementary material

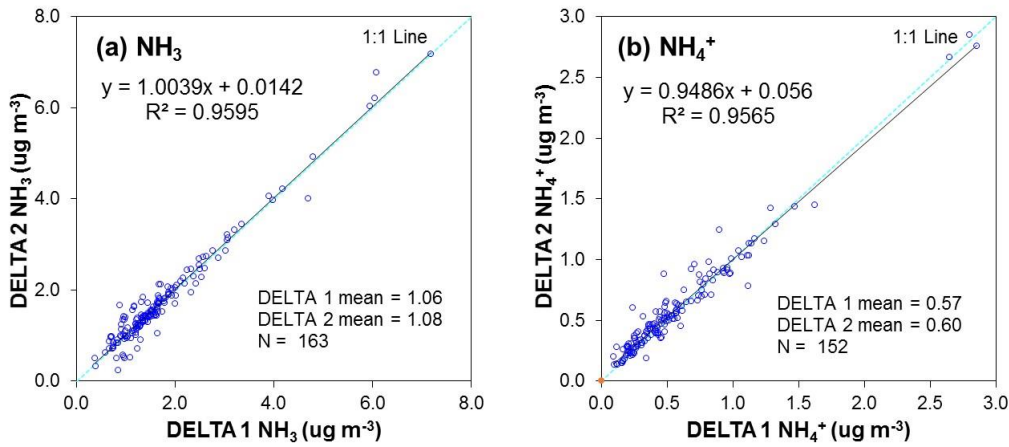

5 **Supp. Figure S1:** Comparisons of parallel measurement of monthly (a) NH<sub>3</sub> and (b) particulate NH<sub>4</sub><sup>+</sup> concentrations from duplicate DELTA sampling at the UK National Ammonia Monitoring Network (NAMN) site Bush OTC (UKA00128) for the period 1999 to 2014.

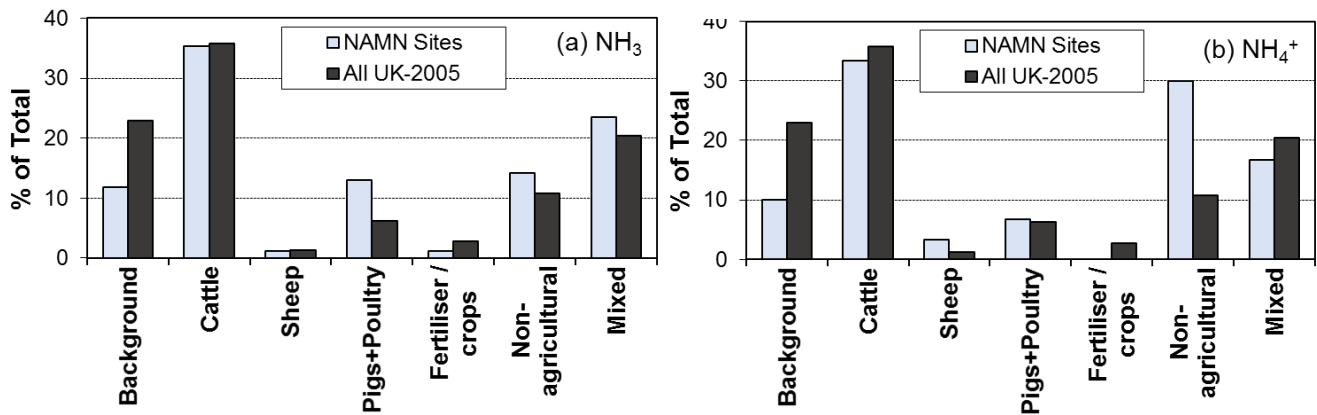

10

**Supp. Figure S2:** Frequency distribution of sites in the UK National Ammonia Monitoring Network NAMN measuring (a) NH<sub>3</sub> (85 sites) and (b) NH<sub>4</sub><sup>+</sup> (30 sites), according to the dominant NH<sub>3</sub> source sectors identified in Error! Reference source not found. (based on the network structure for 2005) compared with the dominant source classification for the whole land area of the UK.

15

20

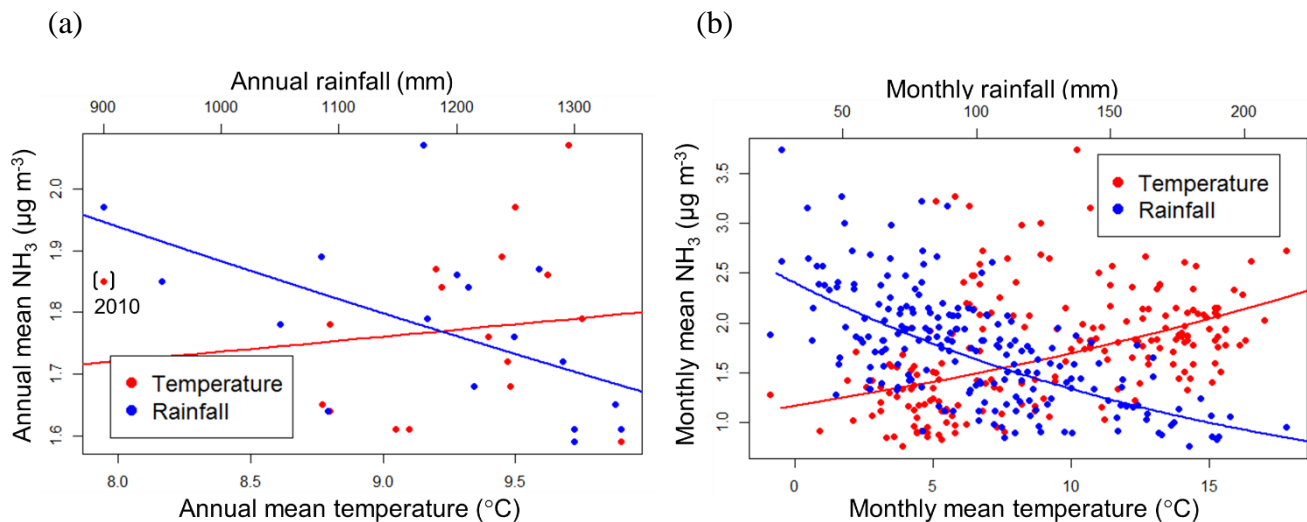

- 5 **Supp. Figure S3: (a) Relationships between UK mean annual measured NH<sub>3</sub> concentrations from 59 sites in the National Ammonia Monitoring Network (NAMN) and mean annual temperature and rainfall (data downloaded from <http://www.metoffice.gov.uk/>) for the period 1998 to 2014. NH<sub>3</sub> was negatively correlated with rainfall (blue line:  $\text{Log}(\text{NH}_3) = -0.0003 \cdot \text{Log}(\text{rain}) + 0.9656$ ,  $R^2 = 0.32$ ,  $n = 17$ ,  $p = 0.02$ ). For the relationship between NH<sub>3</sub> and temperature, although most of the data shows an increase in NH<sub>3</sub> with temperature, the correlation was not significant (red line:  $\text{Log}(\text{NH}_3) = 0.0227 \cdot \text{Log}(\text{temp}) + 0.3618$ ,  $R^2 = 0.02$ ,  $n = 17$ ,  $p = 0.59$ ). 2010 (data point marked on graph) was an unusual year with considerably lower annual mean temperature (7.9 °C) than normal (mean = 9.2 °C for period 1998 – 2014). This was due to exceptionally cold winter temperatures occurring in Jan, Feb, Nov and Dec 2010, with Dec 2010 being the coldest for over 100 years. While the mean temperature for 2010 was lower than usual, the mean annual NH<sub>3</sub> concentration for 2010 was in fact similar to other years, since the lowest NH<sub>3</sub> concentrations occurred in the winter months.**
- 10
- 15 **(b) Relationships between UK mean monthly measured NH<sub>3</sub> concentrations from the NAMN and mean monthly temperature and rainfall from the same selection of sites for the period 1998 to 2014. NH<sub>3</sub> was negatively correlated with rainfall (blue line:  $\text{Log}(\text{NH}_3) = -0.0057 \cdot \text{Log}(\text{rain}) + 1.0579$ ,  $R^2 = 0.45$ ,  $n = 204$ ,  $p < 0.01$ .) and positively correlated with temperature (red line:  $\text{Log}(\text{NH}_3) = 0.0370 \cdot \text{Log}(\text{temp}) + 0.1580$ ,  $R^2 = 0.24$ ,  $n = 204$ ,  $p < 0.01$ ).**

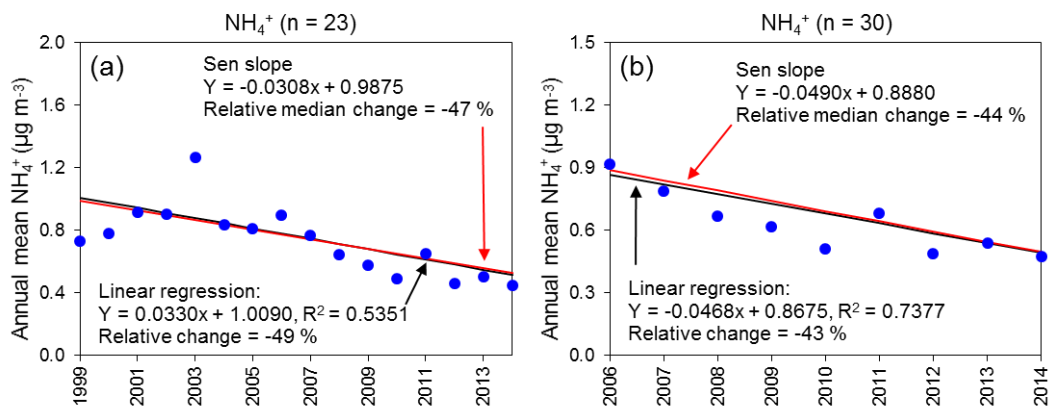

5 **Supp. Figure S4: Time series trend analysis by Mann-Kendall Sen's slope vs squares linear regression on annually averaged particulate  $\text{NH}_4^+$  and gaseous  $\text{NH}_3$  concentrations from the UK National Ammonia Monitoring Network (NAMN) for a)  $\text{NH}_4^+$  (1999-2014, n=23), b)  $\text{NH}_4^+$  (2006-2014, n= 30), c)  $\text{NH}_3$  (1999-2014, n=23, same sites as a), and d)  $\text{NH}_3$  (2006-2014, n=30, same sites as b). Individual data points are annually averaged concentrations.**

10 (a)

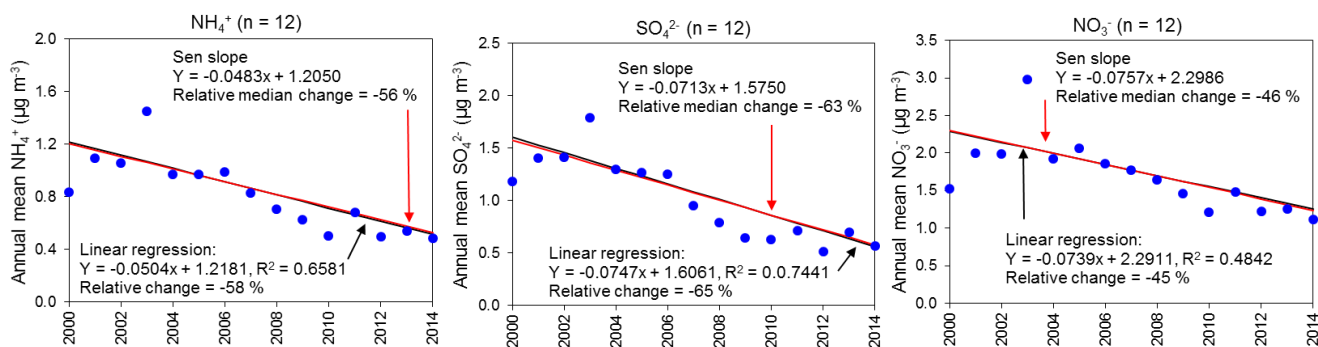

(b)

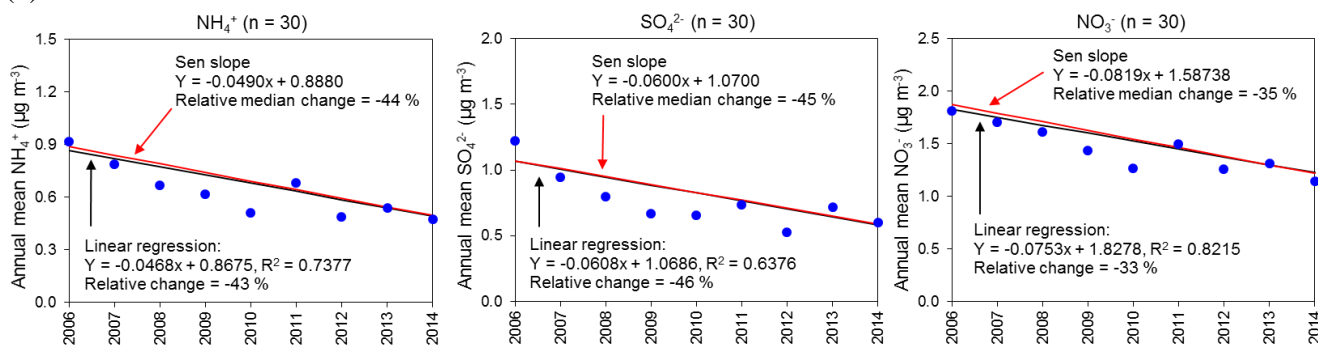

15 **Supp. Figure S5: Time series trend analysis by Mann-Kendall Sen's slope vs linear regression on annually averaged particulate  $\text{NH}_4^+$  from the UK National Ammonia Monitoring Network (NAMN) and particulate  $\text{NO}_3^-$  and  $\text{SO}_4^{2-}$  from the UK Acid Gas and Aerosol Network (AGANet for time periods a) 2000 – 2014 (12 sites) and b) 2006 – 2014 (30 sites). Individual data points are annually averaged concentrations.**
